# Supplementary material for: Alcohol, Tobacco, and Comorbid Psychiatric Disorders and Associations With Sexual Identity and Stress-Related Correlates
Source: Atypon-hosted journal article supplement (doi:10.1176/appi.ajp.2020.20010005), 2020-09-11
Supplement: appi.ajp.2020.20010005.ds001.pdf [file appi.ajp.2020.20010005.ds001.pdf]

Figure S1. Comorbidities among those who met criteria for a past year AUD by sexual identity (a) overall, (b) among men, (c) among women

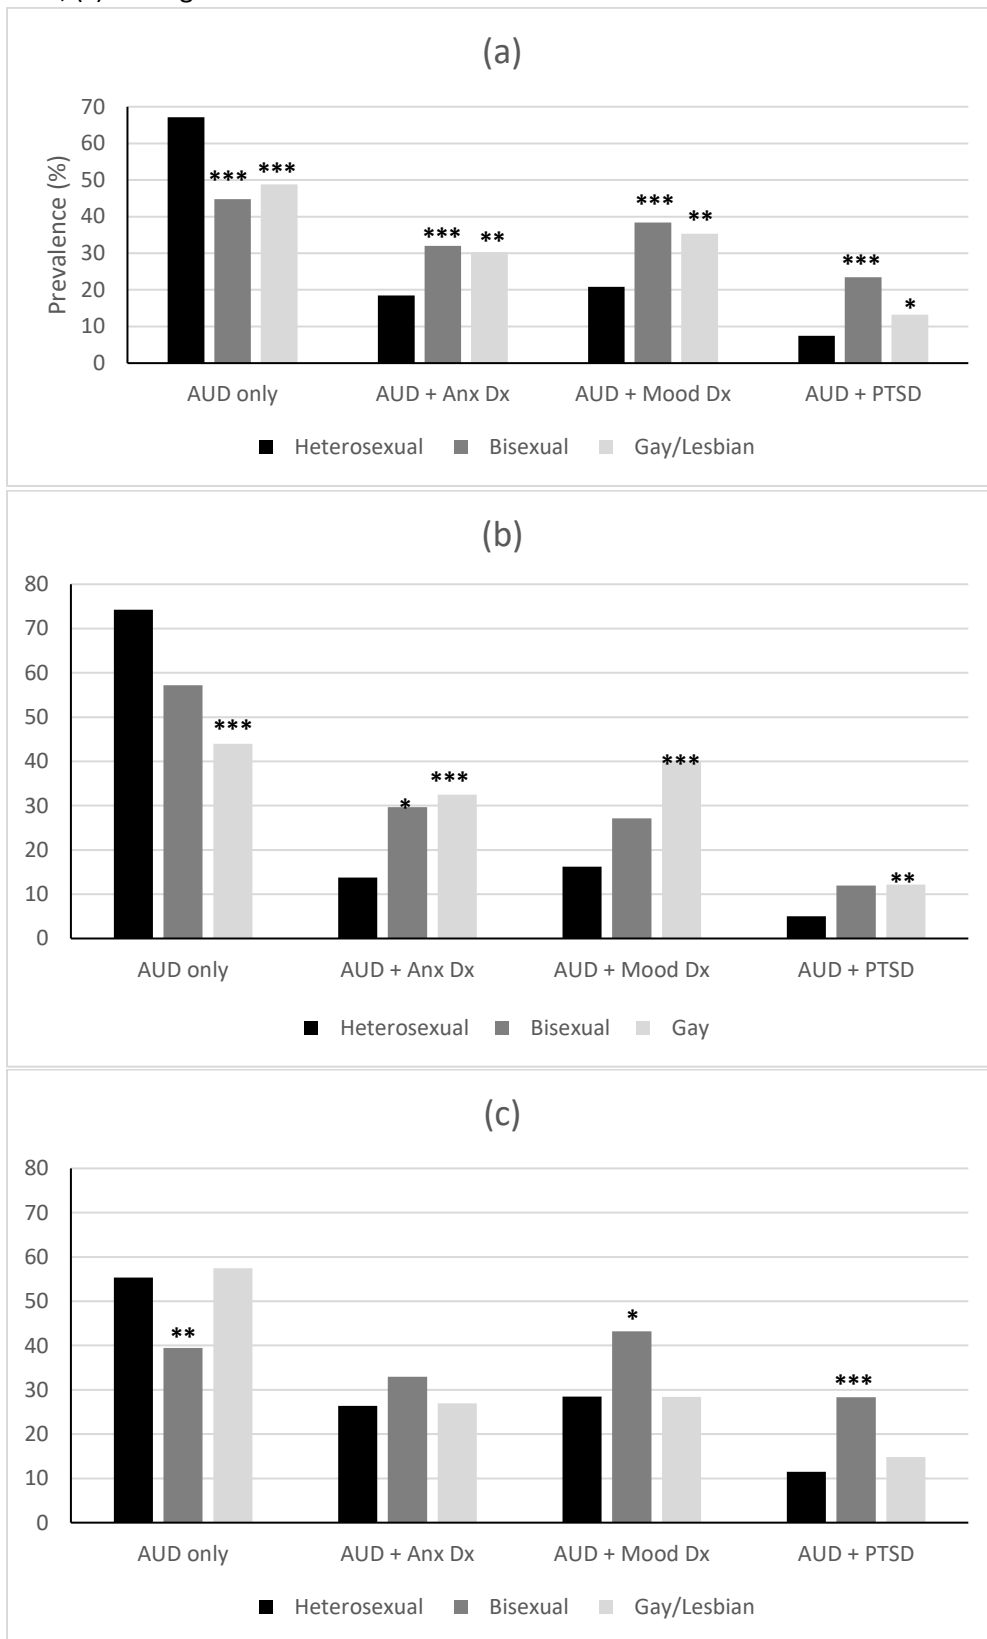

Note: Reference=heterosexual, \*p<0.05, \*\*p<0.01, \*\*\*p<0.001

Figure S2. Comorbidities among those who met criteria for a past year TUD by sexual identity (a) overall, (b) among men, (c) among women

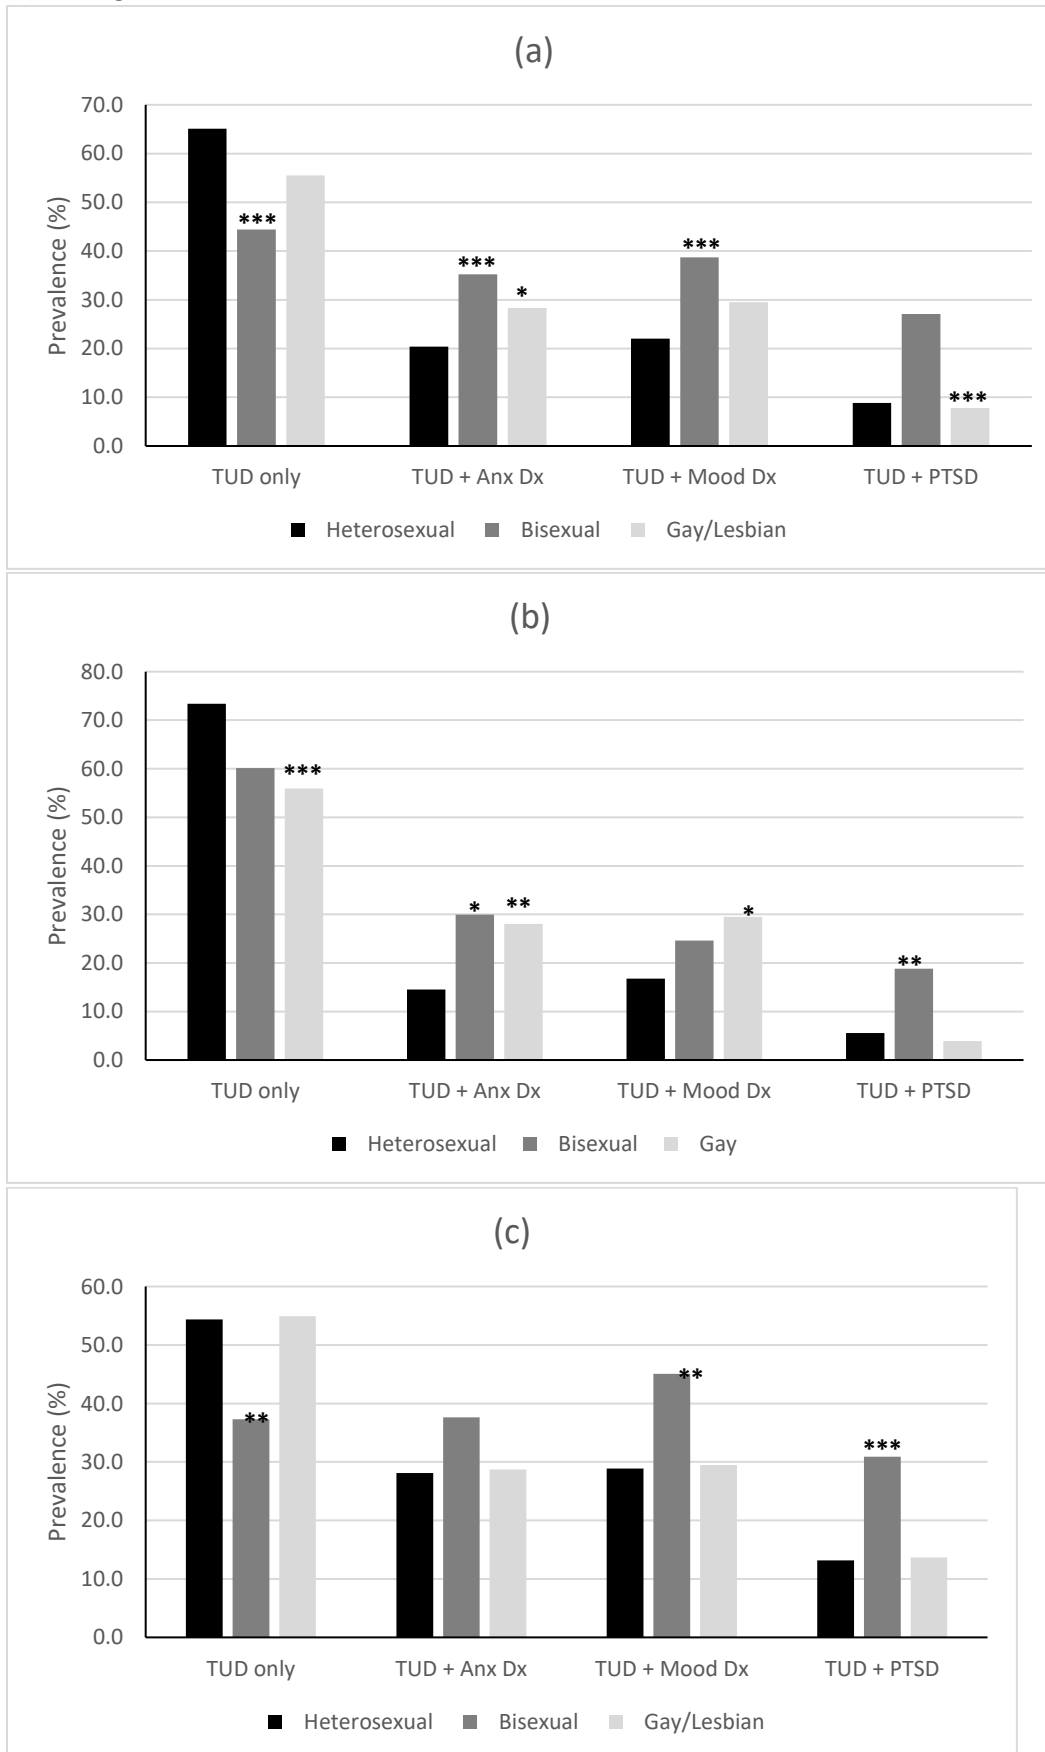

Note: Reference=heterosexual, \*p<0.05, \*\*p<0.01, \*\*\*p<0.001
